# Supplementary material
Source: ML conference proceedings conference paper supplement (https://proceedings.neurips.cc/paper_files/paper/2020/hash/cfd382c5eb817d52c7faf45a96f20b81-Abstract.html)
Supplement: Supplementary file [file cfd382c5eb817d52c7faf45a96f20b81-Supplemental.zip]

# Appendix of “Replica-Exchange Nosé-Hoover Dynamics for Bayesian Learning on Large Datasets”

Anonymous Author(s)

## 1 A Replica Exchange

2 Figure 1 illustrates the runtime trajectories of five replicas, in which two subroutines are executed in an alternating scheme. In the following subsections, theoretical bases will be established.

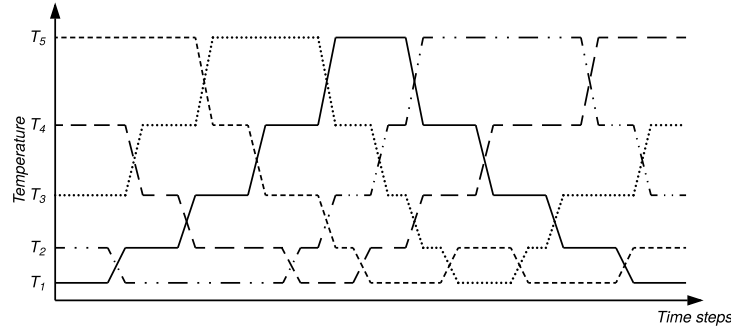

3 Figure 1: A schematic illustration of the replica-exchange protocol. Lines describe 5 trajectories of dynamics of replicas at different temperatures: horizontal segments represent parallel evolution while intersections is replica exchange.

## 4 B Hermite polynomials and the derivatives

5 Table 1 lists the first 3 logistic derivatives of odd orders. For higher orders, a recursive routine [4] is developed for fast computation.

Table 1: An example of Hermite polynomials and the derivatives of  $g(z) = 1/[1 + e^{-z}]$ .

| order   | $H_n[u = \sigma^2/4\lambda]$ | $q_{\mathcal{F}}^{(2n)}(z)$ in terms of $g$     |
|---------|------------------------------|-------------------------------------------------|
| $n = 0$ | 1                            | $g - g^2$                                       |
| $n = 1$ | $2u$                         | $g - 7g^2 + 12g^3 - 6g^4$                       |
| $n = 2$ | $4u^2 - 2$                   | $g - 31g^2 + 180g^3 - 390g^4 + 360g^5 - 120g^6$ |

6

## 7 C Empirical results of Gaussianity test on stochastic gradient when training ResNet

8 Figure 2 illustrates the trajectories of percentage of Gaussian elements within the stochastic gradients during training ResNet-20; each curve represents a different block of ResNet-20. It is clear that the percentage of Gaussian elements within each blocks are higher than 90%, which indicates the Gaussianity assumption for ResNet are appropriate hypothesis.

## 12 D Effective potentials of replicas at different temperatures

13 Figure 3 shows the effective potentials of replicas at different temperatures; the corresponding  $\pi_j(\theta_j)$  are then illustrated. It becomes clear that when climbing the increasing ladder of temperatures  $\{T_j\}$ ,  $\pi_j(\theta_j)$  moves gradually towards a flat histogram.

Submitted to 34th Conference on Neural Information Processing Systems (NeurIPS 2020). Do not distribute.

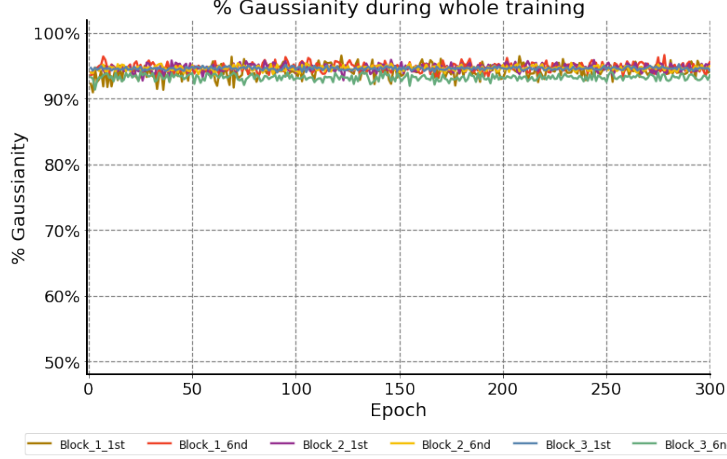

Figure 2: Gaussianity of each layer in ResNet-20 during training epochs.

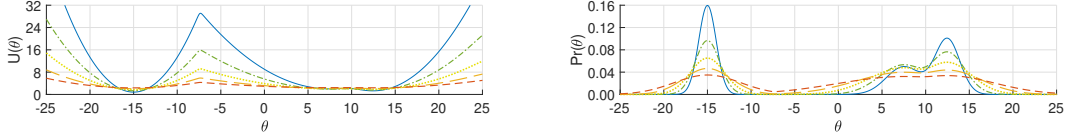

Figure 3: (colored) The *left* plot shows the effective potentials for 5 replicas at different temperatures. As temperature rises, the energy barrier at  $-7$  reduces, which facilitates the passage. The *right* gives the marginal distributions, moving towards flattened histograms during tempering. The blue curves is the real potential (*left*) and thus the true posterior (*right*) at  $T = 1$ .

## 16 E Proof of Theorem 1

17 *Proof.* We prove the existence of the invariant distributions. The uniqueness follows as a consequence  
18 of the assumption on ergodicity.

19 The Nosé-Hoover dynamics in (3) defines a system of stochastic differential equations, which governs  
20 the time evolution of state in a probabilistic way from a microscopic perspective. On the other  
21 hand, consider the entire ensemble, *i.e.* the collection of all possible states, its evolution can be  
22 characterized statistically from a macroscopic point of view through the time evolution of state  
23 distribution  $\pi_j(\Gamma_j, t)$ . The Fokker-Planck equation [6] translates the stochastic dynamics of state into  
24 the differential equation

$$\begin{aligned} \dot{\pi}_j(\Gamma_j, t) = & -\partial_{\theta_j}^\top [p_j \pi_j] - \partial_{p_j}^\top [f(\theta_j) \pi_j] + \partial_{p_j}^\top [\xi_j p_j \pi_j] \\ & - \partial_{\xi_j} [(p_j^\top p_j - T_j d) \pi_j] + \partial_{p_j}^\top [B \partial_{p_j} \pi_j], \end{aligned} \quad (1)$$

25 which can be solved deterministically or even analytically; the invariant distributions can be indicated  
26 by  $\dot{\pi}_j(\Gamma_j, t) = 0$ .

27 We presume that the invariant distribution of  $\xi$  is separable from that of  $\theta_j$  and  $p_j$  so that  
28  $\pi_j(\Gamma_j) = \pi_j(\xi_j) \pi_j(\theta_j, p_j)$ . For the marginal distribution  $\pi_j(\theta_j, p_j)$ , we consider the typical Boltzmann  
29 distribution for the Hamiltonian system  $(\theta_j, p_j)$  with the potential  $U$  and an additive quadratic kinetic  
30 energy  $p_j^\top p_j / 2$  (we presume all replicas have unit masses) as is defined for our system:

$$\pi_j(\theta_j, p_j) \propto \exp \left[ - \left[ U(\theta_j) + p_j^\top p_j / 2 \right] / T_j \right]. \quad (2)$$

31 When solving  $\dot{\pi}_j(\Gamma_j, t) = 0$ , the Boltzmann  $\pi_j(\theta_j, p_j)$  in (2) results in the Hamiltonian dynamics [5];  
32 the first and second terms in (1) therefore cancel with each other. The resulting equation *w.r.t.*  $\pi_j(\xi_j)$   
33 is simplified as

$$\frac{1}{\pi_j(\xi_j)} \frac{d\pi_j(\xi_j)}{d\xi_j} = - \frac{1}{T_j} \left[ \xi_j - \frac{B}{T_j} \right],$$

34 which gives the unique solution up to a normalizing constant

$$\pi_j(\xi) \propto \exp \left[ -\frac{(\xi_j - B/T_j)^2}{2T_j} \right]. \quad (3)$$

35 Combining two marginal distributions in (2) and (3), the joint distribution of state is obtained as in  
36 (4), which is invariant by construction.  $\square$

## 37 F Well-Tempered Ensemble for replica reduction

38 In this section, we discuss an “optional” device, the *Well-tempered Ensemble* (WTE) [1], for RENHD.  
39 WTE is important, albeit not indispensable, for its use of enhancing the memory efficiency of RENHD  
40 by reducing the number of replicas for real-world applications, especially for deep neural networks.

41 In learning very deep neural networks, it might be the case that the parameters grows to hundreds of  
42 millions, or even billions. As the efficiency of RENHD relies on the chance of successful exchanges,  
43 and the latter is a function of (potential) energy differences: in our case, it resembles the logistic  
44 function  $g(\Delta E_{jk})$ . For a pair of replicas  $(j, k)$ , a greater overlap of the energy distributions  $\pi_j(E)$   
45 and  $\pi_k(E)$  will lead to a better chance on the exchange between  $\theta_j$  and  $\theta_k$ . However, observations  
46 reveal that the overlap will decrease in the rate of  $1/\sqrt{d}$  when the system size  $d$  (*i.e.* the dimension for  
47  $\theta \in \mathbb{R}^d$ ) increases [3]. Therefore, to retain a constant acceptance probability, the number of replicas  
48 needs to increase in  $\sqrt{d}$ . For very large systems, the amount of replicas might be prohibitively large.

49 WTE manages to reduce the number of replicas by enlarging the energy overlap of replicas. It  
50 constructs and then maintains for each replica  $j$  a time-dependent biasing potential  $A_j^\gamma(E, t)$  with  
51  $\gamma > 1$  denoting the *tempering factor*, which is a predefined constant defining the increase of energy  
52 overlaps by WTE. Figure 4 illustrates the effect of deploying WTE on a demo model with Gaussian  
53 energy distributions; the overlap of energy distributions (of adjacent replicas) is substantially enlarged.

54 The time evolution of the biasing potential  $A_j^\gamma$  in WTE is defined by

$$\frac{dA_j^\gamma(E, t)}{dt} = h \exp \left[ -\frac{A_j^\gamma(E, t)}{(\gamma - 1)T_j} \right] \cdot \delta[E - U(\theta_j(t))], \quad (4)$$

55 where  $\theta_j(t)$  indicates the trajectory of  $\theta_j$  at time  $t$ ,  $h$  is a constant determining the learning rate of  
56  $A_j^\gamma$ , and  $\delta[\cdot]$  denotes the Dirac delta function. As  $\gamma$  is a constant, we hereafter omit it for simplicity.  
57 Intuitively, the dynamics (4) gradually builds up a  $1d$  landscape  $A_j$  for replicas  $j$ , with the coordinates  
58 being the energy  $E$ , at a rate of  $h$ . The way it determines where to make such incremental changes is  
59 by calculating the potential  $U$  at the current configuration  $\theta_j(t)$ .

60 It has been shown that  $A_j(E, t)$  converges asymptotically [2]. With  $A_j(E) := A_j(E, t \rightarrow \infty)$ ,  
61 the augmented potential can be defined as  $V_j(\theta_j) := U(\theta_j) + A_j(U(\theta_j))$  and the tempered energy  
62 distribution reads

$$\begin{aligned} \tilde{\pi}_j^A(E) &\propto \int \delta[E - U(\theta_j)] e^{-V(\theta_j)/T_j} d\theta_j \\ &= \left( \int \delta[E - U(\theta_j)] d\theta_j \right) e^{-[E + A_j(E)]/T_j}. \end{aligned} \quad (5)$$

63 **Theorem 1** ([1]). *The energy distribution (5) of the WTE-augmented replica  $j$  with converged  $A_j$*   
64 *satisfies*

$$\tilde{\pi}_j^A(E) \propto [\pi_j(E)]^{1/\gamma}, \quad (6)$$

65 indicating that the fluctuation  $\text{var}[E]$  w.r.t.  $\tilde{\pi}_j^A$  is effectively amplified by a factor  $\gamma$ .

66 *Proof.* We firstly recall equation (5). We define the integral in the last equity as the temperature-  
67 independent density of states, formulated as

$$N_j(E) := \int \delta[E - U(\theta_j)] d\theta_j \quad (7)$$

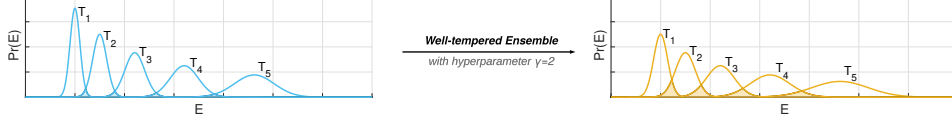

Figure 4: Effect of deploying WTE on a set of 5 replicas at different temperatures. On the *left* depicts the real histograms of replicas’ energy distributions while the *right* shows their tempered counterparts. With WTE enabled, the energy overlap (*shaded*) of adjacent replicas is greatly enlarged, leading to a better chance for successful exchange and thus a higher efficiency.

---

**Algorithm 1** Replica-exchange Nosé-Hoover dynamics with Well-tempered Ensemble

---

```

1: function NHDYNAMICS( $\{\theta_j\}, \{A_j[\cdot]\}, \{T_j\}, \text{model}, \mathcal{D}, |\mathcal{S}|_{\text{nhd}}, N, \epsilon, c, \gamma, h, \Delta$ )
2:    $\triangleright$  NHD length  $N$ ;  $\epsilon, c$  in (20);  $\gamma, h$  in (4);  $\Delta$  for quantizing  $A_j$ 
3:   for all  $\{j\}$  do
4:      $v_j \sim \mathcal{N}(0, T_j \epsilon)$  and  $s_j \leftarrow c/T_j$   $\triangleright$  all  $j$  running in parallel
5:     for  $n = \text{RANGE}(1, N)$  do  $\triangleright$  resetting auxiliary variables
6:        $\mathcal{S} \leftarrow \text{NEXTBATCH}(\mathcal{D}, |\mathcal{S}|_{\text{nhd}})$   $\triangleright$  fetching new mini-batch
7:        $E_j \leftarrow \text{model.FORWARD}(\theta_j, \mathcal{S})$   $\triangleright E_j := U(\theta_j)$ 
8:        $\tilde{f}_j \leftarrow \text{model.BACKWARD}(\theta_j, \mathcal{S})$   $\triangleright$  evaluating mini-batch gradient
9:        $i \leftarrow \text{QUANTIZE}(E_j)$   $\triangleright$  indexing  $A_j[i]$  for quantized  $E_j$ 
10:       $dA_j \leftarrow [A_j[i+1] - A_j[i]] / \Delta$   $\triangleright$  approximating  $dA_j(E)/dE$ 
11:       $dV_j \leftarrow [1 + dA_j] \tilde{f}_j$   $\triangleright V_j := U(\theta_j) + A_j(U(\theta_j))$ 
12:       $v_j \leftarrow v_j + dV_j \epsilon - s_j v_j + \mathcal{N}(0, 2c\epsilon)$   $\triangleright$  additional Gaussian noise added
13:       $\theta_j \leftarrow \theta_j + v_j$  and  $s_j \leftarrow s_j + [v_j^\top v_j / d - T_j \epsilon]$   $\triangleright$  simulating NHD in (3)
14:       $A_j[i] \leftarrow A_j[i] + h \exp[-A_j[i]/(\gamma-1)T_j]$   $\triangleright$  updating  $A_j[\cdot]$  cf. (11)
15:   return  $\{\theta_j\}, \{A_j[\cdot]\}$ 

16: MAIN:
17:  $\{\theta_j\} \leftarrow \text{RANDN}()$  and  $\{A_j[\cdot]\} \leftarrow \text{ZEROS}()$   $\triangleright$  initialization
18:  $\text{args} \leftarrow (|\mathcal{S}|_{\text{nhd}}, N, \epsilon, c, \gamma, h, \Delta)$   $\triangleright$  packing arguments
19: loop
20:    $\{\theta_j\}, \{A_j[\cdot]\} \leftarrow \text{NHDYNAMICS}(\{\theta_j\}, \{A_j[\cdot]\}, \{T_j\}, \text{model}, \mathcal{D}, \text{args})$ 
21:    $\{(j, k)\} \leftarrow \text{RAND}()$   $\triangleright$  sampling a set of replicas to swap
22:   for all  $\{(j, k)\}$  do
23:      $\text{EXCHANGE}(\theta_j, \theta_k, \text{model}, \mathcal{D}, |\mathcal{S}|_{\text{re}}, \sigma_*^2, \lambda, \tilde{q}_{\mathcal{E}})$   $\triangleright$  recall Algorithm 1
24:     if  $\theta_j$  and  $\theta_k$  exchanged then swap  $A_j[\cdot]$  and  $A_k[\cdot]$ 
25:    $\text{samples} \leftarrow [\text{samples}, \theta_0]$   $\triangleright$  reweighting needed using (9) or (10)
```

---

68 such that the tempered energy distribution is re-written as

$$\tilde{\pi}_j^A(E) \propto N_j(E) e^{-[E + A_j(E)]/T_j}.$$

69 As stated by [1], the equilibrium of biasing potential  $A_j^\gamma(U) := A_j^\gamma(U, t \rightarrow \infty)$  can be formulated as

$$\begin{aligned}
A_j^\gamma(E) &= -\frac{(\gamma-1)}{\gamma} \cdot [-T_j \log \pi_j(E)] \\
&= -\frac{(\gamma-1)}{\gamma} \cdot T_j \log [N_j(E) e^{-E/T_j}]^{-1} + \text{const} \\
&= -\frac{(\gamma-1)}{\gamma} \cdot [E - T_j \log N(E)] + \text{const}, \tag{8}
\end{aligned}$$

After WTE has converged, the actual potential is essentially the superposition  $U(\theta_j) + A_j^\gamma(U(\theta_j))$  of the biasing potential and the original unbiased one. With (7) and (8), the energy distribution reads

$$\begin{aligned}\pi_j^A(E) &\propto \int \delta[E - U(\theta_j)] e^{-[U(\theta_j) + A_j^\gamma(U(\theta_j))]/T_j} d\theta_j \\ &= \left[ \int \delta[E - U(\theta_j)] d\theta_j \right] \exp \left[ -\frac{E + A_j^\gamma(E)}{T_j} \right] \\ &= N(E) \exp \left[ -\frac{E + (\gamma - 1)T_j \log N(E)}{\gamma T_j} \right] \\ &= [N(E) e^{-E/T_j}]^{1/\gamma} = [\pi_j(E)]^{1/\gamma},\end{aligned}$$

which would give an approximately same average  $\langle E \rangle$  as in the canonical ensemble but with the fluctuation  $\text{var}[E]$  amplified by a factor of  $\gamma$ .

74

□

An intuitive example can be obtained when the energy distribution is Gaussian, *i.e.*  $\pi_j(E) \propto e^{-(E - \langle E \rangle)^2/2T_j}$ , the well-tempered distribution is also Gaussian with the exactly same average but larger variance  $\pi_j^A(E) = [\pi_j(E)]^{1/\gamma} \propto e^{-(E - \langle E \rangle)^2/2\gamma T_j}$ .

The marginal distribution of  $\theta_j$  for the WTE-augmented replica  $j$  is then modified as (*cf.* (??))

$$\begin{aligned}\tilde{\pi}_j^A(\theta_j) &\propto e^{-V_j(\theta_j)/T_j} \\ &= \exp \left[ -\frac{U(\theta_j) + A_j(U(\theta_j))}{T_j} \right] \propto \pi_j(\theta_j) e^{-A_j(U(\theta_j))/T_j},\end{aligned}\tag{9}$$

which deviates from the concerned marginal distribution  $\pi_j(\theta_j)$  in (??) by a factor  $e^{-A_j(U(\theta_j))/T_j}$ . A re-weighting procedure needs to be conducted by simply implementing importance sampling with the same factor. In practical scenarios where WTE is deployed, large models, *e.g.* deep neural networks, often involve; it is usually the canonical average of some function  $r(\theta_j)$ , *i.e.* its Monte Carlo integration *w.r.t.*  $\pi_j(\theta_j)$ , rather than the posterior distribution  $\rho(\theta|\mathcal{D}) \equiv \pi(\theta|T=1)$  itself that really matters. For that average, we can readily evaluate it in a simple and unbiased way derived from (9):

$$\langle r(\theta_j) \rangle_{\pi_j} = \frac{\langle r(\theta_j) e^{A_j(U(\theta_j))/T_j} \rangle_{\tilde{\pi}_j^A}}{\langle e^{A_j(U(\theta_j))/T_j} \rangle_{\tilde{\pi}_j^A}}, \text{ with samples from } \tilde{\pi}_j^A,\tag{10}$$

where the biasing potential  $A_j(U(\theta_j))$  can be evaluated on the fly during the simulation.

Now we devise WTE's update rule for replica  $j$  by setting an array to restore the biasing potential  $A_j$ . Given the granularity  $\Delta$ , the energy  $E$  is quantized; each segment is then associated to one of the cells in that array.  $A_j$  is evaluated for all quantized  $E$ , with the values registered in the corresponding cells. Time is discretized  $t \rightarrow n\Delta t$  using the same steps; the differential equation (4) is hence converted into

$$A_j[E; n] \leftarrow A_j[E; n-1] + h \delta_{E, E_j^{(n)}} \exp \left[ -\frac{A_j[E_j^{(n)}; n-1]}{(\gamma-1)T_j} \right],\tag{11}$$

where the learning rate  $h$  controls the size of increments,  $\delta_{E, E_j^{(n)}}$  defines the Kronecker delta function in the quantized  $E$  while  $E_j^{(n)} := U(\theta_j(n\Delta t))$  denoting the potential energy evaluated at the  $n$ -th step. By initializing  $A_j[E; 0] \equiv 0$ , the biasing potential is adaptively accumulated through the simulation. Algorithm 1 provides a procedural description of RENHD with WTE deployed..

## References

- [1] Massimiliano Bonomi and Michele Parrinello. Enhanced sampling in the well-tempered ensemble. *Physical review letters*, 104(19):190601, 2010.
- [2] James F Dama, Michele Parrinello, and Gregory A Voth. Well-tempered metadynamics converges asymptotically. *Physical review letters*, 112(24):240602, 2014.

- 100 [3] David J Earl and Michael W Deem. Parallel tempering: Theory, applications, and new perspec-  
101 tives. *Physical Chemistry Chemical Physics*, 7(23):3910–3916, 2005.
- 102 [4] Ali A Minai and Ronald D Williams. On the derivatives of the sigmoid. *Neural Networks*,  
103 6(6):845–853, 1993.
- 104 [5] Radford M Neal. MCMC using Hamiltonian dynamics. *Handbook of Markov Chain Monte*  
105 *Carlo*, 2:113–162, 2011.
- 106 [6] H. Risken and H. Haken. *The Fokker-Planck Equation: Methods of Solution and Applications*  
107 *Second Edition*. Springer, 1989.
